# Supplementary material for: Suitability of a Programme for Improving Interprofessional Primary Care Team Meetings
Source: PubMed Central journal article supplement (PMC6293205; doi:10.5334/ijic.4179), 2018-12-13
Supplement: ijic-18-4-4179-s1.pdf [file ijic-18-4-4179-s1.pdf]

|                                                                                             | Total group<br>(N=78) |              | Team 1<br>(N=13) |             | Team 2<br>(N=14) |             | Team 3<br>(N=18) |              | Team 4<br>(N=16) |             | Team 5<br>(N=10) |             | Team 6<br>(N=7) |             |
|---------------------------------------------------------------------------------------------|-----------------------|--------------|------------------|-------------|------------------|-------------|------------------|--------------|------------------|-------------|------------------|-------------|-----------------|-------------|
|                                                                                             | Mean                  |              | Mean             |             | Mean             |             | Mean             |              | Mean             |             | Mean             |             | Mean            |             |
|                                                                                             | T0<br>(N=29)          | T1<br>(N=49) | T0<br>(N=4)      | T1<br>(N=9) | T0<br>(N=6)      | T1<br>(N=8) | T0<br>(N=8)      | T1<br>(N=10) | T0<br>(N=7)      | T1<br>(N=9) | T0<br>(N=4)      | T1<br>(N=6) | T0<br>(N=0)     | T1<br>(N=7) |
| <b>Part 1.1 Communication and innovation (DTCI) (range 1-5)</b>                             |                       |              |                  |             |                  |             |                  |              |                  |             |                  |             |                 |             |
| 1. We share information generally in the team rather than keeping it to ourselves.          | 4.38                  | 4.31         | 4.75             | 4.67        | 4.67             | 4.25        | 4.00             | 4.20         | 4.43             | 4.22        | 4.25             | 4.33        |                 | 4.14        |
| 2. Assistance in developing new ideas is readily available.                                 | 3.76                  | 3.88         | 4.50             | 4.00        | 3.50             | 3.88        | 3.75             | 3.80         | 3.43             | 3.89        | 4.00             | 3.83        |                 | 3.86        |
| 3. We all influence each other.                                                             | 3.93                  | 3.96         | 4.25             | 3.89        | 3.67             | 4.00        | 3.63             | 3.80         | 4.29             | 4.11        | 4.00             | 4.00        |                 | 4.00        |
| 4. We keep in regular contact with each other.                                              | 4.07                  | 4.06         | 4.50             | 3.78        | 4.33             | 4.25        | 3.88             | 4.20         | 3.86             | 4.11        | 4.00             | 3.83        |                 | 4.14        |
| 5. In this team we take the time needed to develop new ideas.                               | 3.10                  | 3.71         | 3.50             | 3.67        | 3.17             | 3.13        | 2.63             | 4.00         | 3.14             | 3.89        | 3.50             | 3.50        |                 | 4.00        |
| 6. People feel understood and accepted by each other.                                       | 4.07                  | 4.22         | 4.75             | 4.67        | 4.00             | 4.00        | 3.75             | 4.30         | 4.14             | 4.00        | 4.00             | 4.17        |                 | 4.14        |
| 7. Everyone's view is listened to, even if it is in a minority.                             | 4.10                  | 4.22         | 4.75             | 4.67        | 4.17             | 4.00        | 3.88             | 4.20         | 4.00             | 4.11        | 4.00             | 4.33        |                 | 4.00        |
| 8. The team is open and responsive to change.                                               | 4.03                  | 4.14         | 4.50             | 4.33        | 4.00             | 4.00        | 3.75             | 4.20         | 4.00             | 4.11        | 4.25             | 4.17        |                 | 4.00        |
| 9. People in the team co-operate in order to help develop and apply new ideas.              | 3.55                  | 3.94         | 4.00             | 3.78        | 3.67             | 4.25        | 3.00             | 4.20         | 3.71             | 4.11        | 3.75             | 3.50        |                 | 3.57        |
| 10. We have a 'we are in it together' attitude.                                             | 4.14                  | 4.29         | 4.50             | 4.67        | 4.33             | 4.38        | 3.75             | 4.10         | 4.00             | 4.22        | 4.50             | 4.50        |                 | 3.86        |
| 11. We interact frequently.                                                                 | 3.21                  | 3.22         | 3.75             | 3.00        | 3.50             | 3.50        | 2.75             | 3.30         | 2.86             | 3.56        | 3.75             | 3.00        |                 | 2.86        |
| 12. People keep each other informed about work-related issues in the team                   | 4.00                  | 3.82         | 4.25             | 3.78        | 4.17             | 4.13        | 4.00             | 3.80         | 3.57             | 4.00        | 4.25             | 4.00        |                 | 3.14        |
| 13. Members of the team provide and share resources to help in the application of new ideas | 3.45                  | 3.67         | 3.50             | 3.89        | 3.83             | 3.50        | 3.13             | 3.80         | 3.29             | 3.89        | 3.75             | 3.67        |                 | 3.14        |
| 14. There is a lot of give                                                                  | 3.55                  | 3.61         | 4.50             | 3.67        | 3.50             | 3.88        | 3.38             | 3.60         | 3.14             | 3.78        | 3.75             | 3.50        |                 | 3.14        |

|                                                                                         |                    |              |               |             |               |             |               |              |               |             |               |             |               |             |
|-----------------------------------------------------------------------------------------|--------------------|--------------|---------------|-------------|---------------|-------------|---------------|--------------|---------------|-------------|---------------|-------------|---------------|-------------|
| and take                                                                                |                    |              |               |             |               |             |               |              |               |             |               |             |               |             |
| 15. We keep in touch with each other as a team                                          | 3.93               | 3.90         | 4.00          | 3.89        | 4.17          | 4.13        | 3.75          | 3.90         | 3.86          | 3.78        | 4.00          | 3.83        |               | 3.86        |
| 16. People in this team are always searching for fresh, new ways of looking at problems | 3.52               | 3.82         | 4.00          | 3.89        | 3.67          | 3.75        | 3.13          | 3.60         | 3.29          | 4.11        | 4.00          | 3.83        |               | 3.71        |
| 17. There are real attempts to share information throughout the team.                   | 4.14               | 4.16         | 4.50          | 4.33        | 4.00          | 4.00        | 4.00          | 4.10         | 4.14          | 4.33        | 4.25          | 4.17        |               | 4.00        |
| 18. This team is always moving towards the development of new answers                   | 3.52               | 3.92         | 4.25          | 3.89        | 3.50          | 4.00        | 3.13          | 3.90         | 3.43          | 4.00        | 3.75          | 4.00        |               | 3.71        |
| 19. Team members provide practical support for new ideas and their application.         | 3.79               | 3.98         | 4.25          | 3.89        | 4.17          | 3.88        | 3.38          | 4.00         | 3.71          | 4.11        | 3.75          | 4.17        |               | 3.86        |
| 20. Members of the team meet frequently to talk both formally and informally.           | 2.83               | 2.78         | 2.75          | 2.56        | 3.33          | 3.38        | 2.38          | 2.60         | 2.14          | 2.67        | 4.25          | 3.00        |               | 2.57        |
|                                                                                         | <b>Total group</b> |              | <b>Team 1</b> |             | <b>Team 2</b> |             | <b>Team 3</b> |              | <b>Team 4</b> |             | <b>Team 5</b> |             | <b>Team 6</b> |             |
|                                                                                         | (N=78)             |              | (N=13)        |             | (N=14)        |             | (N=18)        |              | (N=16)        |             | (N=10)        |             | (N=7)         |             |
|                                                                                         | Mean               |              | Mean          |             | Mean          |             | Mean          |              | Mean          |             | Mean          |             | Mean          |             |
|                                                                                         | T0<br>(N=29)       | T1<br>(N=49) | T0<br>(N=4)   | T1<br>(N=9) | T0<br>(N=6)   | T1<br>(N=8) | T0<br>(N=8)   | T1<br>(N=10) | T0<br>(N=7)   | T1<br>(N=9) | T0<br>(N=4)   | T1<br>(N=6) | T0<br>(N=0)   | T1<br>(N=7) |
| <b>Part 1.2 Objectives (DTCI) (range 1-5)</b>                                           |                    |              |               |             |               |             |               |              |               |             |               |             |               |             |
| 21. How clear are you about what your team objectives are?                              | 3.93               | 4.35         | 4.50          | 4.78        | 4.20          | 4.38        | 3.50          | 3.90         | 3.57          | 4.33        | 4.50          | 4.17        |               | 4.57        |
| 22. To what extent do you think they are useful and appropriate objectives?             | 3.96               | 4.37         | 4.50          | 4.78        | 4.20          | 4.50        | 3.75          | 3.90         | 3.67          | 4.56        | 4.00          | 4.00        |               | 4.43        |
| 23. How far are you in agreement with these objectives?                                 | 4.04               | 4.47         | 4.50          | 4.89        | 4.20          | 4.38        | 3.63          | 4.10         | 3.83          | 4.56        | 4.50          | 4.33        |               | 4.57        |
| 24. To what extent do you think other team members agree with these objectives?         | 3.96               | 4.20         | 4.00          | 4.56        | 4.20          | 4.38        | 3.57          | 3.80         | 3.83          | 4.11        | 4.50          | 4.33        |               | 4.14        |

|                                                                                                             |                    |      |               |      |               |      |               |      |               |      |               |      |               |      |
|-------------------------------------------------------------------------------------------------------------|--------------------|------|---------------|------|---------------|------|---------------|------|---------------|------|---------------|------|---------------|------|
| 25. To what extent do you think your team's objectives are clearly understood by other members of the team? | 3.93               | 4.14 | 4.25          | 4.56 | 4.00          | 4.25 | 3.63          | 3.60 | 3.67          | 4.33 | 4.50          | 4.00 |               | 4.14 |
| 26. To what extent do you think your team's objectives can actually be achieved?                            | 3.85               | 3.94 | 4.00          | 4.33 | 4.00          | 3.75 | 3.71          | 4.20 | 3.86          | 3.56 | 3.75          | 3.83 |               | 3.86 |
| 27. How worthwhile do you think these objectives are to you?                                                | 4.04               | 4.31 | 4.25          | 4.56 | 4.00          | 4.38 | 3.88          | 4.00 | 3.83          | 4.44 | 4.50          | 4.00 |               | 4.43 |
| 28. How worthwhile do you think these objectives are to the organization?                                   | 4.04               | 4.35 | 4.25          | 4.44 | 4.20          | 4.50 | 3.88          | 4.20 | 3.67          | 4.33 | 4.50          | 4.17 |               | 4.43 |
| 29. How worthwhile do you think these objectives are to the wider society?                                  | 4.04               | 4.31 | 4.25          | 4.56 | 4.20          | 4.38 | 3.88          | 4.10 | 3.67          | 4.33 | 4.50          | 4.20 |               | 4.29 |
| 30. To what extent do you think these objectives are realistic and can be attained?                         | 3.85               | 4.04 | 4.00          | 4.56 | 4.00          | 3.50 | 3.63          | 4.00 | 3.67          | 4.11 | 4.25          | 4.00 |               | 4.00 |
| 31. To what extent do you think members of your team are committed to these objectives?                     | 3.67               | 4.08 | 3.75          | 4.00 | 3.60          | 4.13 | 3.71          | 4.30 | 3.29          | 3.89 | 4.25          | 4.00 |               | 4.14 |
|                                                                                                             | <b>Total group</b> |      | <b>Team 1</b> |      | <b>Team 2</b> |      | <b>Team 3</b> |      | <b>Team 4</b> |      | <b>Team 5</b> |      | <b>Team 6</b> |      |

|                                                                                                                               | (N=78)             |              | (N=13)        |             | (N=14)        |             | (N=18)        |              | (N=16)        |             | (N=10)        |             | (N=7)         |             |
|-------------------------------------------------------------------------------------------------------------------------------|--------------------|--------------|---------------|-------------|---------------|-------------|---------------|--------------|---------------|-------------|---------------|-------------|---------------|-------------|
|                                                                                                                               | Mean               |              | Mean          |             | Mean          |             | Mean          |              | Mean          |             | Mean          |             | Mean          |             |
|                                                                                                                               | T0<br>(N=29)       | T1<br>(N=49) | T0<br>(N=4)   | T1<br>(N=9) | T0<br>(N=6)   | T1<br>(N=8) | T0<br>(N=8)   | T1<br>(N=10) | T0<br>(N=7)   | T1<br>(N=9) | T0<br>(N=4)   | T1<br>(N=6) | T0<br>(N=0)   | T1<br>(N=7) |
| <b>Part 1.3 Task style (DTCI) (range 1-5)</b>                                                                                 |                    |              |               |             |               |             |               |              |               |             |               |             |               |             |
| 32. Do your team colleagues provide useful ideas and practical help to enable you to do the job to the best of your ability?  | 4.18               | 4.37         | 4.50          | 4.44        | 4.00          | 4.38        | 4.00          | 4.50         | 4.00          | 4.33        | 4.75          | 4.33        |               | 4.14        |
| 33. Do you and your colleagues monitor each other so as to maintain a higher standard of work?                                | 3.77               | 4.06         | 4.25          | 4.33        | 3.80          | 3.88        | 3.29          | 4.30         | 3.50          | 3.78        | 4.50          | 4.17        |               | 3.86        |
| 34. Are team members prepared to question the basis of what the team is doing?                                                | 3.44               | 4.19         | 4.00          | 4.38        | 3.40          | 4.00        | 3.00          | 4.60         | 3.57          | 3.78        | 3.50          | 4.00        |               | 4.29        |
| 35. Does the team critically appraise potential weaknesses in what it is doing in order to achieve the best possible outcome? | 2.44               | 3.00         | 2.75          | 3.33        | 2.33          | 2.50        | 2.33          | 3.30         | 2.00          | 2.89        | 3.25          | 3.00        |               | 2.83        |
| 36. Do members of the team build on each other's ideas in order to achieve the best possible outcome?                         | 3.67               | 4.12         | 4.50          | 4.33        | 3.60          | 4.00        | 3.20          | 4.30         | 3.00          | 4.11        | 4.50          | 4.00        |               | 3.86        |
| 37. Is there a real concern among team members that the team should achieve the highest standards of performance?             | 4.00               | 4.24         | 4.50          | 4.44        | 3.83          | 4.50        | 3.67          | 4.50         | 3.86          | 4.22        | 4.50          | 4.00        |               | 3.57        |
| 38. Does the team have clear criteria which members try to meet in order to achieve excellence as a team?                     | 2.81               | 3.85         | 4.25          | 4.00        | 2.33          | 3.25        | 2.33          | 4.22         | 2.00          | 4.00        | 4.00          | 3.67        |               | 3.86        |
|                                                                                                                               | <b>Total group</b> |              | <b>Team 1</b> |             | <b>Team 2</b> |             | <b>Team 3</b> |              | <b>Team 4</b> |             | <b>Team 5</b> |             | <b>Team 6</b> |             |

|                                                                                                         | (N=78)       |              | (N=13)      |             | (N=14)      |             | (N=18)      |              | (N=16)      |             | (N=10)      |             | (N=7)       |             |
|---------------------------------------------------------------------------------------------------------|--------------|--------------|-------------|-------------|-------------|-------------|-------------|--------------|-------------|-------------|-------------|-------------|-------------|-------------|
|                                                                                                         | Mean         |              | Mean        |             | Mean        |             | Mean        |              | Mean        |             | Mean        |             | Mean        |             |
|                                                                                                         | T0<br>(N=29) | T1<br>(N=49) | T0<br>(N=4) | T1<br>(N=9) | T0<br>(N=6) | T1<br>(N=8) | T0<br>(N=8) | T1<br>(N=10) | T0<br>(N=7) | T1<br>(N=9) | T0<br>(N=4) | T1<br>(N=6) | T0<br>(N=0) | T1<br>(N=7) |
| <b>Part 2 (range 1-7)</b>                                                                               |              |              |             |             |             |             |             |              |             |             |             |             |             |             |
| 39. Team members encourage patients/clients to be active participants in care decisions.                | 5.21         | 5.41         | 6.00        | 5.78        | 4.17        | 5.25        | 5.14        | 5.70         | 5.29        | 5.44        | 6.00        | 4.50        |             | 5.43        |
| 40. Team members meet face-to-face with patients/clients cared for by the team.                         | 6.25         | 6.04         | 6.00        | 6.44        | 6.83        | 6.38        | 6.00        | 6.10         | 6.14        | 5.56        | 6.25        | 6.17        |             | 5.57        |
| 41. Information relevant to health care planning is shared with the patient/client.                     | 5.39         | 5.47         | 6.25        | 5.33        | 5.33        | 5.75        | 5.43        | 5.30         | 4.86        | 5.22        | 5.50        | 5.67        |             | 5.71        |
| 42. The patient/client is considered a member of their health care team.                                | 3.50         | 4.08         | 3.50        | 4.00        | 2.83        | 3.75        | 3.29        | 4.30         | 3.71        | 4.56        | 4.50        | 3.83        |             | 3.86        |
| 43. The patient's/client's family and supports are included in care planning, at the patient's request. | 5.61         | 5.69         | 6.25        | 5.89        | 5.00        | 5.75        | 5.71        | 5.60         | 5.29        | 5.33        | 6.25        | 5.83        |             | 5.86        |
| 44. Members of our team have a good understanding of patient/client care plans and treatment goals.     | 5.21         | 5.10         | 5.50        | 6.00        | 5.83        | 5.38        | 5.14        | 4.10         | 4.57        | 5.89        | 5.25        | 5.00        |             | 4.14        |
| 45. Our way of working during team meetings can be considered efficient.                                | 5.07         | 5.78         | 6.25        | 6.33        | 4.50        | 5.50        | 4.57        | 5.40         | 5.00        | 6.11        | 5.75        | 5.33        |             | 5.86        |
| 46. Our team meetings lead to good outcomes.                                                            | 5.46         | 5.86         | 6.50        | 6.22        | 5.33        | 5.88        | 4.86        | 5.50         | 5.29        | 6.00        | 6.00        | 5.83        |             | 5.71        |
| 47. The shared care plans link with the patients' personal wishes and preferences.                      | 5.29         | 5.31         | 6.25        | 6.22        | 5.33        | 5.13        | 5.00        | 5.20         | 4.86        | 5.11        | 5.50        | 5.17        |             | 4.86        |
| 48. Score for overall team functioning (range 1-10)                                                     | 7.411        | 7.673        | 9.000       | 8.389       | 7.333       | 7.625       | 6.714       | 7.250        | 7.071       | 7.667       | 7.750       | 7.667       |             | 7.429       |

|                                                     | Total group<br>(N=78) |              | Team 1<br>(N=13) |             | Team 2<br>(N=14) |             | Team 3<br>(N=18) |              | Team 4<br>(N=16) |             | Team 5<br>(N=10) |             | Team 6<br>(N=7) |             |
|-----------------------------------------------------|-----------------------|--------------|------------------|-------------|------------------|-------------|------------------|--------------|------------------|-------------|------------------|-------------|-----------------|-------------|
|                                                     | T0<br>(N=29)          | T1<br>(N=49) | T0<br>(N=4)      | T1<br>(N=9) | T0<br>(N=6)      | T1<br>(N=8) | T0<br>(N=8)      | T1<br>(N=10) | T0<br>(N=7)      | T1<br>(N=9) | T0<br>(N=4)      | T1<br>(N=6) | T0<br>(N=0)     | T1<br>(N=7) |
| <b>Total mean scores per section</b>                |                       |              |                  |             |                  |             |                  |              |                  |             |                  |             |                 |             |
| Mean scores<br>Part 1.1: Q1-20<br>(range 1-5)       | 3.75                  | 3.88         | 4.18             | 3.94        | 3.86             | 3.91        | 3.45             | 3.88         | 3.62             | 3.95        | 3.98             | 3.87        |                 | 3.69        |
| Mean scores<br>Part 1.2: Q21-31<br>(range 1-5)      | 3.90                  | 4.24         | 4.20             | 4.55        | 4.07             | 4.23        | 3.57             | 4.01         | 3.68             | 4.23        | 4.34             | 4.13        |                 | 4.27        |
| Mean scores<br>Part 1.3: Q 32-38<br>(range 1-5)     | 3.48                  | 3.96         | 4.10             | 4.16        | 3.28             | 3.79        | 3.08             | 4.21         | 3.14             | 3.87        | 4.14             | 3.88        |                 | 3.76        |
| Mean scores<br>Part 2: Q39-47<br>(range 1-7)        | 5.22                  | 5.42         | 5.83             | 5.80        | 5.01             | 5.42        | 5.01             | 5.24         | 5.00             | 5.47        | 5.66             | 5.26        |                 | 5.22        |
| Mean score team<br>functioning: Q48<br>(range 1-10) | 7.41                  | 7.67         | 9.00             | 8.39        | 7.33             | 7.63        | 6.71             | 7.25         | 7.07             | 7.67        | 7.75             | 7.67        |                 | 7.43        |

T0 = pretest

T1 = posttest
